# Supplementary material
Source: Research Square preprint supplement (doi:10.21203/rs.3.rs-10050782/v1)
Supplement: Supplementary file 1 [file 4e26281aa0c0986b0ae53f5b.docx]

**Additional file 1**

Supplementary Methods and Supplementary Tables S1–S10.

**Supplementary Methods**

**Extended cohort construction and data extraction**

The cohort was assembled from structured records by direct database query. In MIMIC-IV, the decision point (t0) was the first intravenous furosemide administration (item 221794, amount > 0) recorded in the input-events table. Vasopressor exposure, used to define the stable baseline and the new-vasopressor component of the outcome, was identified from continuous infusions of norepinephrine, epinephrine, dopamine, phenylephrine, and vasopressin (items 221906, 221289, 221662, 221749, and 222315). Mean arterial pressure was taken from the derived vital-sign table, or from the chart-events table (items 220052, 225312, 220181) where required. In eICU-CRD, which records time as an integer offset in minutes from unit admission rather than as a timestamp, t0 was the earliest intravenous furosemide event, taken from the medication table (intravenous route) together with the infusion-drug table. Vasopressor infusions were identified from the free-text drug names in the infusion-drug table — matching norepinephrine or levophed, epinephrine, phenylephrine or neosynephrine, vasopressin or pitressin, and dopamine — and consolidated into continuous exposure intervals by a gaps-and-islands procedure (infusions separated by no more than 60 minutes were treated as one interval). Mean arterial pressure was taken from the union of invasive (periodic systemic mean) and non-invasive (aperiodic) measurements. Patient age recorded as “> 89” was set to 90 years, and death was timed at unit discharge when the discharge status was “Expired”, a coarser ascertainment than in MIMIC-IV. Because vasopressor and furosemide ascertainment in eICU-CRD relied on free-text drug-name matching, occasional misclassification cannot be excluded and is noted as a limitation. The numbers of admissions excluded at each step are shown in Fig. 1.

Three database-specific points are relevant to interpretation. First, insurance status, primary language, and the Charlson comorbidity index were available only in MIMIC-IV and were therefore not used in the model evaluated externally; their exploratory use within the development database is reported in Table S7. Second, a cumulative pre-decision fluid balance was derived in MIMIC-IV only, by summing inputs recorded in millilitres or litres and outputs recorded in the output-events table; this is an approximation that omits drug diluents and oral intake and is not an exact fluid balance, and it was used only in the exploratory analysis. Third, the lower frequency of laboratory measurement in eICU-CRD (Table S2) was handled by the frozen-imputation and measurement-indicator strategy rather than by re-estimating any quantity in the external cohort.

**Table S1.** Data dictionary for the harmonised predictor set, with definitions, time windows, and source tables in each database.

| **Predictor** | **Definition and time window** | **Source (MIMIC-IV | eICU-CRD)** |
| --- | --- | --- |
| Age | Age at admission, in years | patients.anchor_age | patient.age (“> 89” → 90) |
| Female sex | Female sex (binary) | patients.gender | patient.gender |
| First furosemide dose | Dose of the first intravenous furosemide at t₀, in mg | inputevents (221794) | medication (IV route) |
| Heart rate (mean) | Mean heart rate in the 6 h before t₀ | vitalsign | vitalperiodic |
| MAP at t₀ / minimum / mean | Mean arterial pressure at t₀, and its minimum and mean over the 6 h before t₀, in mmHg | vitalsign / chartevents (220052/225312/220181) | vitalperiodic ∪ vitalaperiodic |
| SpO₂ (mean) | Mean peripheral oxygen saturation in the 6 h before t₀, in % | vitalsign | vitalperiodic |
| Serum creatinine | Most recent value before t₀, in mg/dL | labevents | lab |
| Blood urea nitrogen | Most recent value before t₀, in mg/dL | labevents | lab |
| Sodium, potassium, bicarbonate | Most recent values before t₀, in mmol/L | labevents | lab |
| Haemoglobin | Most recent value before t₀, in g/dL | labevents | lab |
| Platelet count, white cell count | Most recent values before t₀, in ×10⁹/L | labevents | lab |
| Lactate | Most recent value before t₀, in mmol/L | labevents | lab |
| Invasive mechanical ventilation | Invasive ventilation in effect at or before t₀ (binary) | derived ventilation / procedureevents | respiratorycare / treatment |
| Lactate measured / albumin measured | Binary indicator of whether a pre-t₀ value was recorded | derived from labevents | lab |
| Albumin (value) — not used | Serum albumin value; excluded as a predictor owing to high missingness (Table S2) | labevents | lab |

*All predictors were derived exclusively from data recorded before the decision point t0. Where two sources are listed, the MIMIC-IV source precedes the eICU-CRD source. MAP, mean arterial pressure; SpO2, peripheral oxygen saturation. The harmonised set comprises 20 variables (counting the three MAP summaries separately).*

**Missing data by database**

The frequency of missingness for each continuous predictor in each database is shown in Table S2. Missingness was generally low in MIMIC-IV (mostly below 2%) and higher in eICU-CRD, reflecting less frequent laboratory measurement. Lactate and serum albumin were the most frequently missing; for albumin the value was not used as a predictor, and a measurement indicator was retained instead. For the logistic regression model, continuous predictors were imputed to the median estimated in the development data and applied unchanged to the external data; the gradient-boosting model handled missing values natively.

**Table S2.** Frequency of missing values for each continuous predictor, by database.

| **Variable** | **Development (MIMIC-IV), % missing** | **External (eICU-CRD), % missing** |
| --- | --- | --- |
| Age | 0.0 | 0.0 |
| First furosemide dose | 0.0 | 1.3 |
| Heart rate (mean) | 0.6 | 4.7 |
| MAP at t₀ | 1.1 | 5.4 |
| MAP (minimum) | 1.1 | 5.4 |
| MAP (mean) | 1.1 | 5.4 |
| SpO₂ (mean) | 0.7 | 5.9 |
| Serum creatinine | 1.1 | 11.4 |
| Blood urea nitrogen | 1.1 | 11.5 |
| Sodium | 1.5 | 10.6 |
| Potassium | 1.4 | 9.1 |
| Bicarbonate | 1.4 | 10.9 |
| Haemoglobin | 1.4 | 11.1 |
| Platelet count | 1.5 | 12.5 |
| White cell count | 1.4 | 12.0 |
| Lactate | 38.4 | 77.2 |
| Albumin (value; not used as predictor) | 73.1 | 54.0 |

*Values are the percentage of admissions with no recorded pre-decision value. Categorical predictors (sex, invasive ventilation) and the measurement indicators had no missing values. Serum albumin value was not used as a predictor.*

**Model specification and software**

Model hyperparameters were pre-specified and were not tuned against any evaluation data. The full specification and the software environment used to produce all results are listed in Table S3.

**Table S3.** Model hyperparameters, analysis settings, and software environment.

| **Setting / component** | **Value / version** |
| --- | --- |
| Gradient boosting — learning rate | 0.05 |
| Gradient boosting — maximum tree depth | 4 |
| Gradient boosting — number of boosting rounds | 400 |
| Gradient boosting — L2 regularisation (λ) | 1.0 |
| Gradient boosting — row subsampling | 0.8 |
| Gradient boosting — column subsampling | 0.8 |
| Gradient boosting — tree method / objective | histogram / binary logistic |
| Logistic regression — penalty (λ) | L2 (ridge), C = 1.0 (fixed); predictors standardised |
| Standardisation / imputation | estimated on development data, applied unchanged externally |
| Bootstrap replications (95% CI) | 1,000 |
| Recalibration | logistic; fitted on a random half, evaluated on the held-out half |
| Integrated calibration index | lowess; span 0.6; 0 robustifying iterations |
| Random seed | 42 |
| Python | 3.12.9 |
| scikit-learn | 1.8.0 |
| XGBoost | 3.2.0 |
| statsmodels | 0.14.6 |
| NumPy | 2.4.4 |
| pandas | 2.3.3 |
| SciPy | 1.17.1 |

*Hyperparameters were fixed a priori; no data-driven hyperparameter or predictor selection was performed.*

**Predictor effects and relative importance**

To describe which variables drove the predicted risk, Table S4 reports the standardised coefficients and per-standard-deviation odds ratios of the ridge logistic-regression model, alongside the gain-based relative importance of each predictor in the gradient-boosting model. The two models agreed on the dominant predictors: the three mean-arterial-pressure summaries together accounted for about 39% of the gradient-boosting importance and carried the largest (negative) logistic coefficients, so that lower pre-decision blood pressure was the strongest predictor of subsequent intolerance. Older age, higher heart rate, higher lactate, and higher blood urea nitrogen followed and all predicted higher risk, a pattern consistent with clinical expectation. The standardised coefficient for serum creatinine was, by contrast, weakly negative (odds ratio 0.94, with a confidence interval spanning one), most likely reflecting collinearity with blood urea nitrogen rather than a genuine protective effect; it should not be read as higher creatinine predicting lower risk. The two measurement indicators contributed little (odds ratios near one), indicating that the informative-missingness signal was weak in this task. Although the lactate measurement indicator ranks relatively high on gradient-boosting gain importance (5.0%, Table S4), gain-based importance tends to overstate the marginal value of a binary split; the ablation below, rather than the gain ranking, is the appropriate measure of its contribution. Consistent with this, removing both measurement indicators left external performance essentially unchanged (gradient-boosting external AUROC 0.766 versus 0.767, and calibration intercept +0.19 versus +0.16; ridge AUROC 0.765 versus 0.764, intercept +0.39 versus +0.39), indicating that the indicators neither materially aided nor harmed transportability despite albumin being measured in opposite proportions in the two databases.

**Table S4.** Ridge logistic-regression coefficients and gradient-boosting relative importance for the 20 predictors.

| **Predictor** | **Coefficient (standardised)** | **Odds ratio per 1 SD (95% CI)** | **XGBoost importance (%)** |
| --- | --- | --- | --- |
| MAP (mean) | -0.543 | 0.58 (0.52–0.65) | 15.6 |
| MAP (minimum) | -0.339 | 0.71 (0.65–0.78) | 15.0 |
| MAP at t0 | -0.190 | 0.83 (0.76–0.91) | 8.3 |
| Lactate measured | +0.031 | 1.03 (0.99–1.08) | 5.0 |
| Female sex | +0.123 | 1.13 (1.09–1.18) | 4.9 |
| Age | +0.257 | 1.29 (1.24–1.35) | 4.5 |
| First furosemide dose | +0.078 | 1.08 (1.03–1.13) | 4.1 |
| Heart rate (mean) | +0.162 | 1.18 (1.13–1.23) | 3.7 |
| Lactate | +0.133 | 1.14 (1.10–1.20) | 3.6 |
| SpO2 (mean) | -0.075 | 0.93 (0.89–0.97) | 3.5 |
| Blood urea nitrogen | +0.119 | 1.13 (1.06–1.19) | 3.5 |
| Sodium | -0.077 | 0.93 (0.89–0.97) | 3.4 |
| Invasive ventilation | +0.057 | 1.06 (1.02–1.10) | 3.4 |
| Albumin measured | +0.051 | 1.05 (1.01–1.10) | 3.3 |
| Platelet count | +0.038 | 1.04 (0.99–1.08) | 3.2 |
| White cell count | +0.007 | 1.01 (0.97–1.04) | 3.1 |
| Bicarbonate | +0.006 | 1.01 (0.96–1.05) | 3.1 |
| Serum creatinine | -0.058 | 0.94 (0.88–1.01) | 3.0 |
| Haemoglobin | +0.011 | 1.01 (0.97–1.06) | 3.0 |
| Potassium | +0.004 | 1.00 (0.96–1.05) | 2.7 |

*Ridge coefficients are on the standardised predictor scale; the odds ratio is per one-standard-deviation increase (for the four binary indicators — female sex, invasive ventilation, lactate measured, albumin measured — this corresponds to a one-standard-deviation change in the indicator and is shown for completeness). Ninety-five percent confidence intervals are from 1,000 bootstrap resamples. XGBoost importance is the gain-based relative importance (percent of total). A negative coefficient (odds ratio below one) indicates that higher values predict lower risk. Rows are ordered by gradient-boosting importance.*

**Calibration before and after recalibration**

A single logistic recalibration was estimated on one randomly selected half of each validation cohort and evaluated on the held-out half, for both models. Calibration slope and intercept on the held-out half, before and after recalibration, are shown in Table S5. Recalibration substantially reduced the calibration-in-the-large in both settings and for both models, correcting the over-prediction seen under temporal validation and the under-prediction seen under external validation. Under external validation the intercept was brought close to zero (gradient boosting +0.20 to +0.06; ridge +0.44 to +0.08); under temporal validation, which used a smaller held-out sample, recalibration slightly overshot, moving the intercept from negative to mildly positive (gradient boosting −0.40 to +0.21; ridge −0.36 to +0.31). The ridge model, which showed the larger external calibration-in-the-large before recalibration, was corrected as effectively as the gradient-boosting model.

**Table S5.** Calibration slope and intercept on the held-out half, before and after logistic recalibration, for both models.

| **Model** | **Validation setting** | **Calibration slope (before → after)** | **Calibration intercept (before → after)** |
| --- | --- | --- | --- |
| Gradient boosting | Internal temporal | 0.86 → 1.11 | −0.40 → +0.21 |
| Gradient boosting | External geographic | 0.94 → 1.01 | +0.20 → +0.06 |
| Ridge logistic | Internal temporal | 0.97 → 1.22 | −0.36 → +0.31 |
| Ridge logistic | External geographic | 1.02 → 1.04 | +0.44 → +0.08 |

*Values are calibration metrics on the held-out half (a random 50% of the validation cohort not used to estimate the recalibration); they differ slightly from the full-cohort calibration reported in Table 2 owing to sampling. An intercept below zero indicates over-prediction and above zero under-prediction.*

**Basis for the competing-risk equivalence**

By the inclusion criterion requiring follow-up to the 24-hour horizon, every included admission was observed to 24 hours or to an earlier competing death; administrative censoring before 24 hours did not occur. The only departure from complete observation was death within 24 hours, which was treated as a competing event and was negligible (17 of 14,294 development admissions, 0.1%; 1 of 21,677 external admissions, < 0.1%). Under complete follow-up with a negligible competing event, the cumulative incidence of the outcome equals one minus the event-free proportion, and a subdistribution-hazard (Fine–Gray) model reduces to the binary model: the two yield practically indistinguishable estimates. We therefore report the binary model throughout and did not fit a separate subdistribution model. We note that death timing in eICU-CRD is approximated by the unit-discharge time, so 24-hour mortality is probably undercaptured in the external cohort; this does not affect the binary primary outcome, but it means a genuine competing-risk assessment is reliable only in the development cohort, on which this equivalence argument therefore principally rests. We argue the equivalence from the study design rather than from a non-parametric cumulative-incidence estimate, because, with all event-free admissions observed to exactly 24 hours, such an estimate is dominated by the tie at the horizon and is uninformative.

**Model parsimony and feature-set analyses**

Two analyses bracket the harmonised 20-variable model. First, to show how much of the discrimination came from a few routine variables, we compared the harmonised model with a parsimonious five-variable model (age, mean arterial pressure at t0, minimum mean arterial pressure, lactate, and serum creatinine), using the same gradient-boosting specification across all three validation settings (Table S6). The parsimonious model recovered most of the discrimination; the full harmonised set added a modest increment that was most evident under temporal validation (AUROC 0.733 versus 0.715). For reference, mean arterial pressure at t0 alone — the simplest possible rule — achieved AUROC 0.712, 0.681, and 0.729 under cross-validation, temporal, and external validation, so both the parsimonious and the full model improved discrimination by approximately 0.03 to 0.05 over this single-variable benchmark.

**Table S6.** Discrimination of a parsimonious five-variable model and the harmonised 20-variable model across the three validation settings.

| **Model** | **No. of variables** | **CV AUROC** | **Temporal AUROC** | **External AUROC** |
| --- | --- | --- | --- | --- |
| Parsimonious model | 5 | 0.748 | 0.715 | 0.762 |
| Harmonised model | 20 | 0.764 | 0.733 | 0.767 |

*Gradient-boosting model. The parsimonious model comprised age, mean arterial pressure at t0, minimum mean arterial pressure, lactate, and serum creatinine. CV, internal five-fold cross-validation; AUROC, area under the receiver-operating-characteristic curve.*

Second, to show what was lost by restricting predictors to those shared by both databases, we compared the harmonised model with models that additionally included the development-only variables — a cumulative pre-decision fluid balance and 6-hour urine output, and insurance status, primary language, admission type, race, and the Charlson comorbidity index — within MIMIC-IV, using the same gradient-boosting specification and the same internal cross-validation and temporal split (Table S7). Adding all development-only variables increased the cross-validation AUROC from 0.764 to 0.768 and the temporal AUROC from 0.733 to 0.736; the fluid-balance and urine-output variables alone contributed little (cross-validation AUROC 0.766, temporal AUROC 0.734), notwithstanding a clinically consistent median cumulative fluid balance of approximately +1,600 mL at the decision point. These small gains do not offset the loss of external validity that including database-specific variables would entail, supporting the harmonised set for the model intended for transfer.

**Table S7.** Exploratory comparison of the harmonised predictor set with models additionally including development-only variables, within MIMIC-IV.

| **Feature set** | **No. of features** | **CV AUROC** | **CV AUPRC** | **Temporal AUROC** | **Temporal AUPRC** |
| --- | --- | --- | --- | --- | --- |
| Harmonised feature set (main model) | 20 | 0.764 | 0.593 | 0.733 | 0.478 |
| + Volume (fluid balance, urine output) | 22 | 0.766 | 0.593 | 0.734 | 0.481 |
| + Socioeconomic & comorbidity | 98 | 0.766 | 0.599 | 0.734 | 0.483 |
| Full (all development-only features) | 100 | 0.768 | 0.598 | 0.736 | 0.481 |

*Gradient-boosting model; internal five-fold cross-validation (CV) and the temporal split (train ≤ 2016, test 2017 onward) within MIMIC-IV. The feature counts increase from 20 to 98 chiefly because the socioeconomic and comorbidity block expands into approximately 78 indicator columns through one-hot encoding of high-cardinality categorical variables (race, primary language, admission type, insurance). “Development-only” variables were either unavailable in eICU-CRD (insurance status, primary language, the Charlson comorbidity index, and the cumulative fluid-balance and urine-output measures) or, where a related field existed (race or ethnicity, and admission type), recorded with incompatible category coding; all were therefore not harmonised and were not used in the externally validated model. AUROC, area under the receiver-operating-characteristic curve; AUPRC, area under the precision–recall curve.*

**Internal-validation robustness to patient-level clustering**

Because the unit of analysis was the ICU admission and a minority of patients contributed more than one admission (14.5% of development admissions were re-admissions of a patient already represented), the standard cross-validation could in principle be optimistic if admissions of the same patient fell in different folds. To check this, we repeated the internal cross-validation with patient-grouped folds, assigning all admissions of a patient to the same fold (Table S8). Discrimination was essentially unchanged for both models, indicating that patient-level dependence did not materially inflate the internal estimates. The temporal and external validations involve distinct patients and are unaffected by this consideration.

**Table S8.** Internal cross-validation discrimination under standard and patient-grouped folds.

| **Cross-validation scheme** | **Model** | **AUROC** | **AUPRC** |
| --- | --- | --- | --- |
| Standard five-fold | Ridge logistic regression | 0.752 | 0.564 |
|  | XGBoost | 0.764 | 0.593 |
| Patient-grouped (GroupKFold) | Ridge logistic regression | 0.752 | 0.563 |
|  | XGBoost | 0.765 | 0.598 |

*Patient-grouped cross-validation (GroupKFold by patient identifier) places all admissions of a patient in the same fold, eliminating any patient-level information shared across folds. AUROC, area under the receiver-operating-characteristic curve; AUPRC, area under the precision–recall curve.*

**Secondary outcome (acute kidney injury following first intravenous furosemide)**

Acute kidney injury within 48 hours of the decision point was defined by the KDIGO serum-creatinine criterion (an absolute rise of at least 0.3 mg/dL, or a rise to at least 1.5 times the pre-decision baseline). It occurred in 3,625 development admissions (25.4%) and 3,562 external admissions (16.4%). The lower external incidence is most plausibly explained by ascertainment: serum creatinine was missing at baseline in 1.1% of development admissions but 11.4% of external admissions (Table S2), and follow-up creatinine measurements were also less frequent in eICU-CRD, so an AKI event was less likely to be captured. The urine-output component of the KDIGO definition was not applied because urine recording was inconsistent across the two databases. This outcome was reported descriptively to characterise the adverse-event landscape following first intravenous furosemide and was not the subject of a prediction model.

**TRIPOD+AI reporting checklist**

Table S9 maps the 27 items and sub-items of the TRIPOD+AI reporting guideline (Collins et al., BMJ 2024) to the locations in the manuscript at which each is addressed. Item numbers and section headings follow the official checklist (version 11 January 2024); item descriptions are given in abbreviated form.

**Table S9.** TRIPOD+AI reporting checklist: location of each item in the manuscript.

| **Item** | **Checklist item (abbreviated)** | **Reported in** |
| --- | --- | --- |
| 1 | Title identifies the prediction model, target population and outcome | Title page |
| 2 | Abstract (structured; per TRIPOD+AI for Abstracts) | Abstract |
| 3a | Healthcare context, rationale and existing models | Background |
| 3b | Target population, intended use and intended users | Background; Discussion (clinical implications) |
| 3c | Known health inequalities between sociodemographic groups | Not addressed (no health-equity analysis; see Limitations) |
| 4 | Study objectives (development and external validation) | Background (final paragraph) |
| 5a | Sources of data and rationale (development and evaluation) | Methods |
| 5b | Dates of participant data and follow-up | Methods |
| 6a | Study setting; number and location of centres | Methods |
| 6b | Eligibility criteria | Methods; Fig. 1 |
| 6c | Treatments received and their handling | Methods |
| 7 | Data pre-processing, harmonisation and quality checking | Methods; Supplementary Methods |
| 8a | Outcome definition and time horizon | Methods |
| 8b | Outcome assessors (subjective interpretation) | Not applicable (outcome ascertained from structured data) |
| 8c | Blinding of outcome assessment | Not applicable (automated ascertainment from structured data) |
| 9a | Choice of initial predictors and any pre-selection | Methods; Supplementary Methods |
| 9b | Definition and measurement of predictors | Methods; Table S1 |
| 9c | Predictor assessors (subjective interpretation) | Not applicable (structured and laboratory data) |
| 10 | Sample-size justification | Methods |
| 11 | Handling of missing data | Methods; Table S2 |
| 12a | Use and partitioning of the data | Methods |
| 12b | Predictor handling (functional form, standardisation) | Methods |
| 12c | Model type, building steps, tuning and internal validation | Methods; Table S3 |
| 12d | Heterogeneity across clusters | Patient-level clustering examined (Table S8); hospital-level not modelled (see Limitations) |
| 12e | Performance measures and plots | Methods |
| 12f | Model updating (recalibration) method | Methods |
| 12g | Calculation of predictions at evaluation | Methods; Declarations (code availability) |
| 13 | Class imbalance | No imbalance method used; prevalence preserved and reported (Methods; Results) |
| 14 | Fairness approaches | Not addressed (no fairness analysis; see Limitations) |
| 15 | Model output and any thresholds | Methods; Results (decision-curve threshold range; no fixed classification threshold) |
| 16 | Differences between development and evaluation data | Results (Participants; Table 1); Discussion |
| 17 | Ethics approval and consent | Declarations (Ethics approval and consent to participate) |
| 18a | Funding | Declarations (Funding) |
| 18b | Conflicts of interest | Declarations (Competing interests) |
| 18c | Protocol | A protocol was not prepared |
| 18d | Registration | The study was not registered |
| 18e | Data availability | Declarations (Availability of data and materials) |
| 18f | Code availability | Declarations (Availability of data and materials) |
| 19 | Patient and public involvement | No patient or public involvement |
| 20a | Participant flow | Results (Participants); Fig. 1 |
| 20b | Characteristics overall and by setting | Results (Participants); Table 1 |
| 20c | Comparison of predictor distributions (development vs evaluation) | Results (Participants); Table 1 |
| 21 | Participants and events in each analysis | Methods; Results (Participants) |
| 22 | Full model specification | Table S4 and Table S10 (ridge coefficients, intercept, and standardisation constants); Declarations (code availability) |
| 23a | Performance estimates with confidence intervals and plots | Results; Table 2; Fig. 2; Fig. 3 |
| 23b | Heterogeneity in performance across clusters | Not assessed at cluster level (see Limitations) |
| 24 | Model updating results | Results; Fig. 3; Table S5 |
| 25 | Interpretation | Discussion |
| 26 | Limitations | Discussion (limitations) |
| 27a | Handling of poor or unavailable input data at implementation | Methods; Discussion |
| 27b | User interaction and required expertise | Discussion (clinical implications) |
| 27c | Next steps for future research | Discussion (research implications) |

*Item numbers and section headings follow the TRIPOD+AI statement (Collins et al., BMJ 2024;385:e078378; checklist version 11 January 2024); item descriptions are abbreviated. “Not applicable” denotes an item that does not apply to a model developed and evaluated entirely from structured electronic-health-record data; “Not addressed” denotes an applicable item that the present study did not undertake, as noted in the Limitations. t0 denotes the decision point (first intravenous furosemide dose).*

**Deployment specification of the ridge logistic-regression model**

To allow predicted risks to be computed for new patients without access to the fitted code, Table S10 gives the complete specification of the ridge logistic-regression model fitted to the full development cohort (n=14,294; 3,982 events): the model intercept, and for each predictor the imputation value (the development-cohort median, applied to any missing continuous value), the standardisation mean and standard deviation, and the standardised coefficient. A predicted probability is obtained by imputing each missing continuous predictor to its median, standardising every predictor as z = (value − mean) / standard deviation, forming the linear predictor η = −1.187 + Σ (coefficient × z) over the 20 predictors, and applying the logistic transform p = 1 / (1 + exp(−η)). The four binary indicators are entered as 0 or 1 and standardised in the same way. Because absolute risks shift with local event prevalence (Table S5), they should be recalibrated to the deploying setting before being used to guide care; the coefficients themselves transport unchanged.

**Table S10.** Complete deployment specification of the ridge logistic-regression model fitted to the development cohort: intercept, per-predictor imputation value, standardisation constants, and standardised coefficient.

| **Predictor** | **Imputation value (median)** | **Standardisation mean** | **Standardisation SD** | **Coefficient (standardised)** |
| --- | --- | --- | --- | --- |
| MAP, mean (mmHg) | 79.3 | 81.16 | 13.26 | -0.543 |
| MAP, minimum (mmHg) | 70 | 71.10 | 13.79 | -0.339 |
| MAP at t0 (mmHg) | 80 | 81.85 | 16.36 | -0.190 |
| Lactate measured (indicator) | — | 0.62 | 0.49 | 0.031 |
| Female sex | — | 0.45 | 0.50 | 0.123 |
| Age | 70 | 68.34 | 15.09 | 0.257 |
| First furosemide dose (mg) | 20 | 37.30 | 35.79 | 0.078 |
| Heart rate, mean (bpm) | 86.8 | 88.32 | 17.84 | 0.162 |
| Lactate (mmol/L) | 1.5 | 1.64 | 0.85 | 0.133 |
| SpO2, mean (%) | 96.3 | 96.04 | 2.66 | -0.075 |
| Blood urea nitrogen (mg/dL) | 23 | 30.70 | 23.29 | 0.119 |
| Sodium (mmol/L) | 139 | 138.59 | 5.22 | -0.077 |
| Invasive mechanical ventilation | — | 0.28 | 0.45 | 0.057 |
| Albumin measured (indicator) | — | 0.27 | 0.44 | 0.051 |
| Platelet count (×10⁹/L) | 183 | 203.44 | 114.78 | 0.038 |
| White cell count (×10⁹/L) | 10.6 | 11.87 | 9.26 | 0.007 |
| Bicarbonate (mmol/L) | 24 | 24.35 | 5.04 | 0.006 |
| Serum creatinine (mg/dL) | 1 | 1.40 | 1.25 | -0.058 |
| Haemoglobin (g/dL) | 9.7 | 9.98 | 1.99 | 0.011 |
| Potassium (mmol/L) | 4.2 | 4.26 | 0.67 | 0.004 |

*The model intercept is −1.187. Coefficients are on the standardised predictor scale and match those in Table S4 (shown here to three decimal places). Imputation values are the development-cohort medians, applied unchanged to any missing continuous predictor; the four binary indicators — female sex, invasive ventilation, lactate measured, and albumin measured — have no missing values and are entered as 0 or 1. Standardisation constants are the mean and standard deviation of each predictor after median imputation, estimated in the development cohort. Rows follow the order of Table S4. As shown in the main text, predicted probabilities should be recalibrated to local event prevalence before use.*
